# Supplementary material for: Synthesis, structure and photophysical properties of a flavin-based platinum(ii) complex
Source: Royal Society of Chemistry journal article supplement (doi:10.1039/c0dt01139h), 2011-01-01
Supplement: c0dt01139h.pdf [file c0dt01139h.pdf]

# Synthesis, Structure and Photophysical Properties of a Flavin-Based Platinum(II) Complex

Atsushi Kobayashi, Korin Ohbayashi, Rie Aoki, Ho-Chol Chang and Masako Kato

## *Supporting Information*

### Emission lifetime measurement

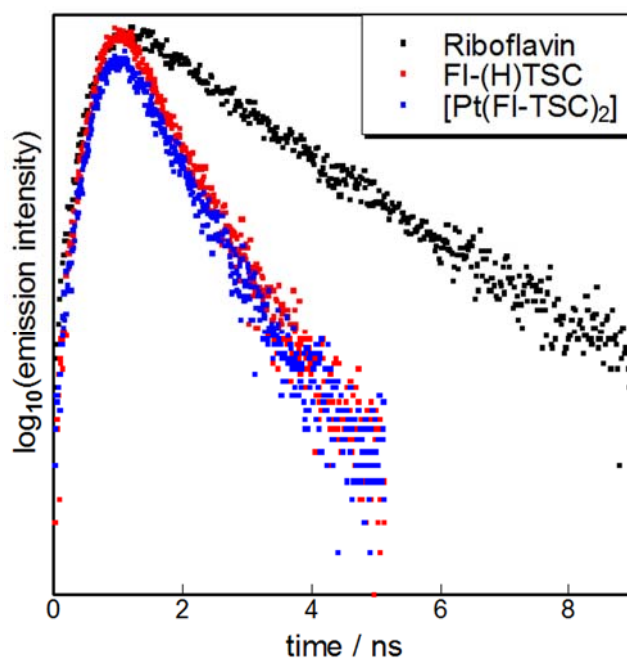

**Figure S1.** Emission decay profiles of riboflavin, **FI-(H)TSC** and **[Pt(FI-TSC)<sub>2</sub>]** compounds in DMSO solution at room temperature.

### Cyclic Voltammograms

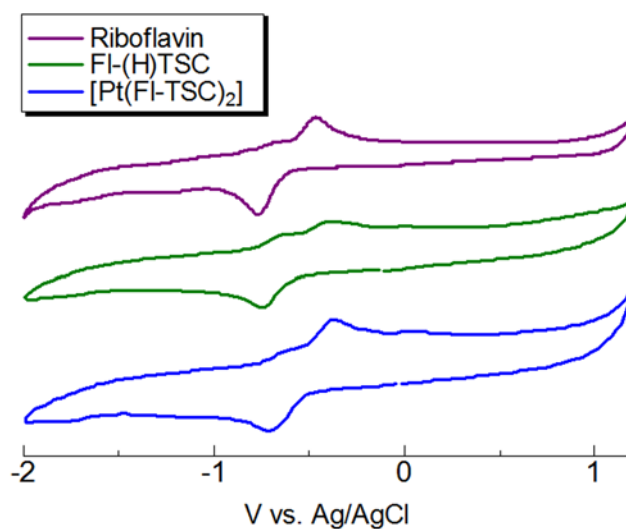

**Figure S2.** Cyclic voltammograms of riboflavin, **FI-(H)TSC** and **[Pt(FI-TSC)<sub>2</sub>]** compounds in distilled DMF solution at room temperature. WE:Pt, CE:Pt, RE: Ag/AgCl, Electrolyte: 0.1 M TBA(PF)<sub>6</sub>

### MO calculation

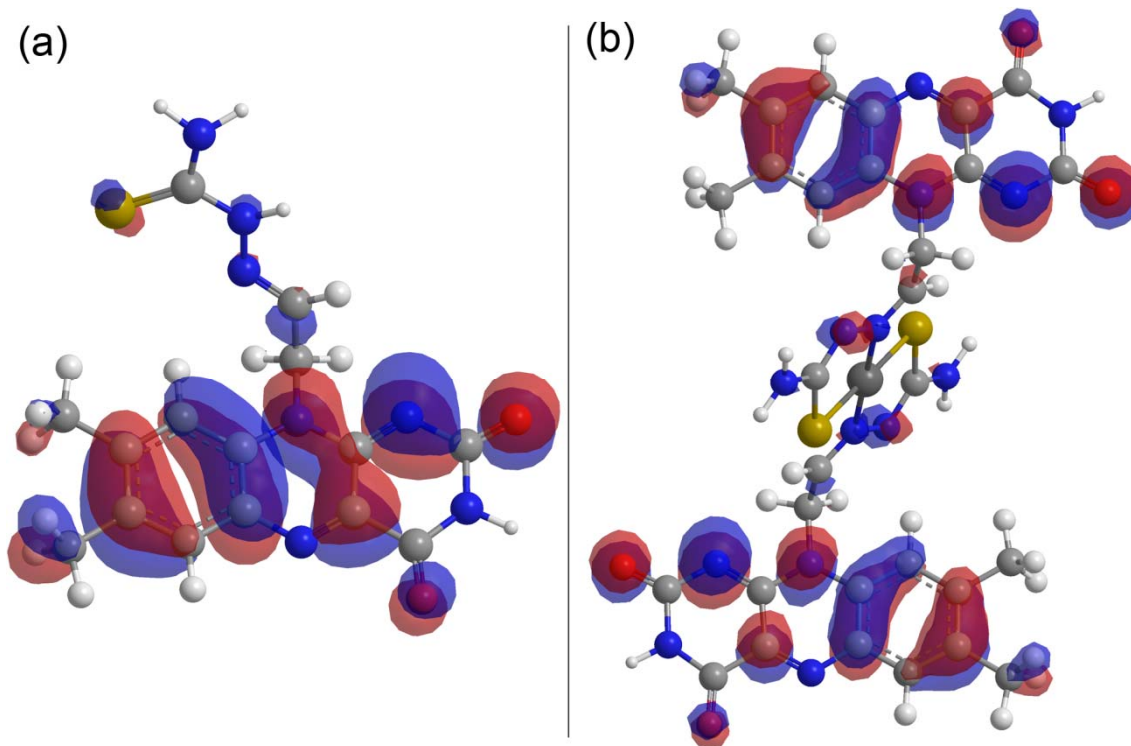

**Figure S3.** The shape of HOMO-1 of **FI-(H)TSC** (a) and **[Pt(FI-TSC)<sub>2</sub>]** (b). The isosurfaces correspond to the value of  $\pm 0.02$ .
